# Supplementary material
Source: PubMed Central journal article supplement (PMC3223606)
Supplement: neo1311_1019SD1.pdf [file neo1311_1019SD1.pdf]

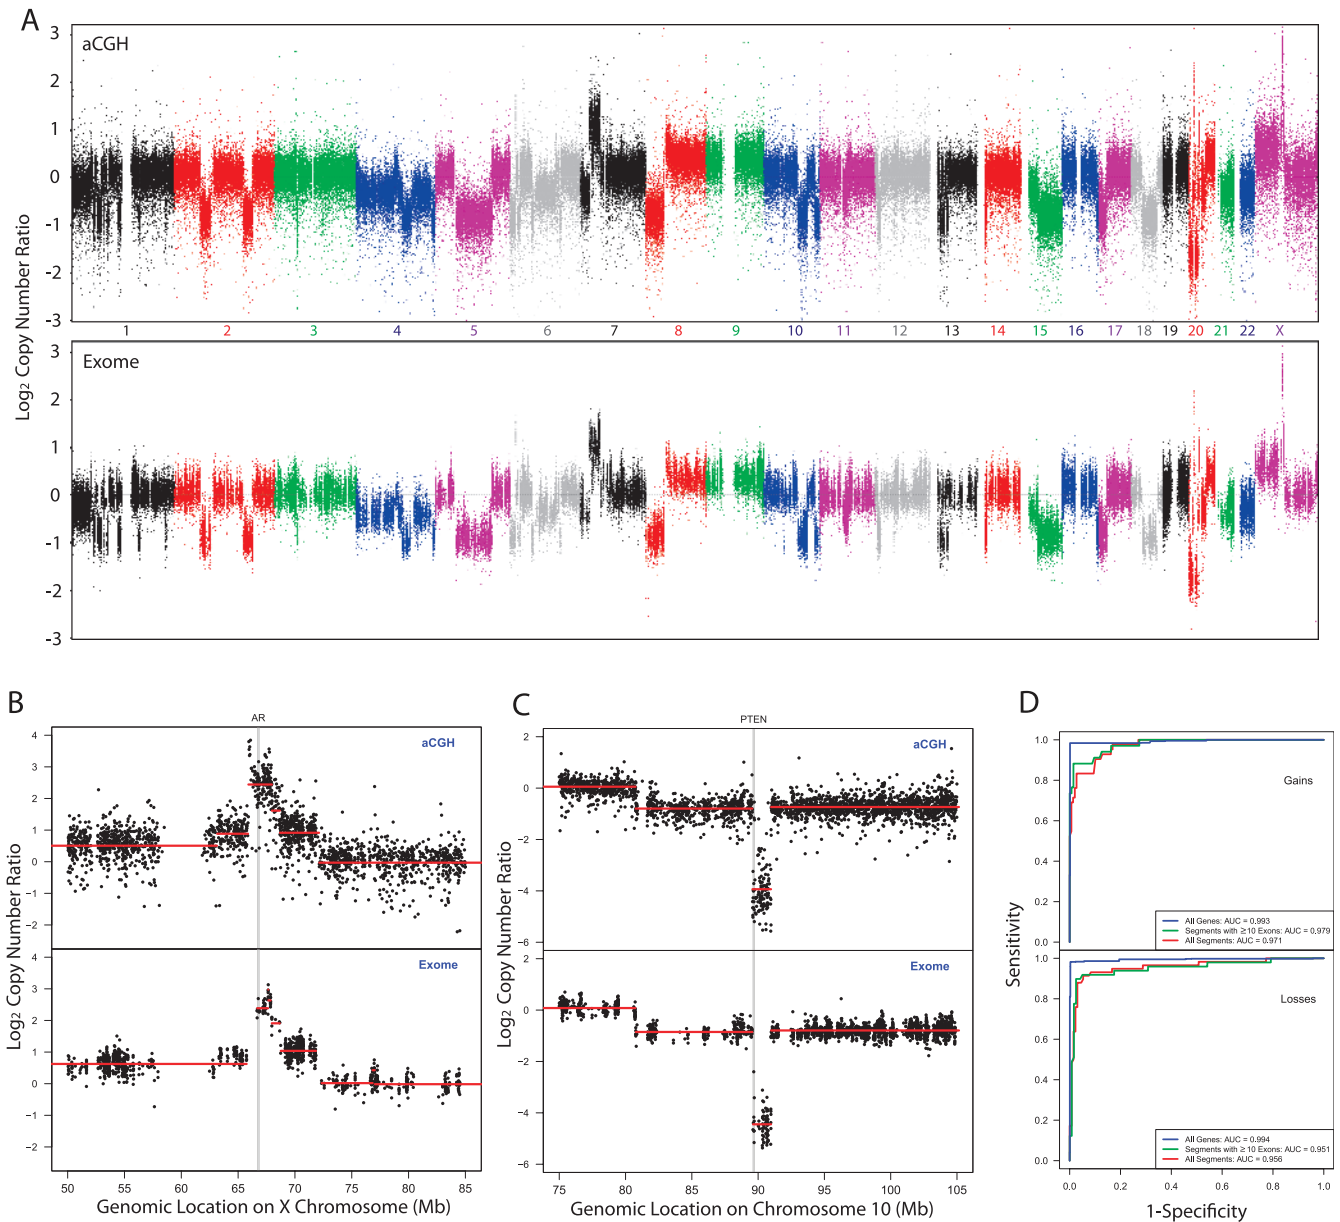

**Figure W1.** Concordance of aCGH and exome capture copy number assessments in sample WA53. (A) Overall copy number across the genome for sample WA53 by aCGH and exome sequencing. Log<sub>2</sub>(copy number ratio) between tumor and matched normal is shown on the vertical axis; each point represents the log-transformed ratio for each aCGH probe or targeted exon, ordered by genomic coordinates. Large-scale amplifications and deletions are visible and agree in magnitude across the two technologies. (B) Copy number for sample WA53 by aCGH and exome sequencing in a 35-Mb region containing the AR gene. Both technologies reveal the same focal pattern of amplification and give similar estimates of the number of copies of the AR gene. Red line segments represent segmented copy number data. (C) Copy number for sample WA53 by aCGH and exome sequencing in a 30-Mb region containing the PTEN gene. Both technologies reveal focal 2-copy loss of PTEN in this sample. Red line segments represent segmented copy number data. (D) Classification performance of exome capture sequencing relative to aCGH for sample WA53. ROC curves are shown, using aCGH copy number assessments as a criterion standard. ROC curves are presented for classifying all aCGH segments (red), segments containing at least ten targeted exons (green), and all targeted genes (blue).

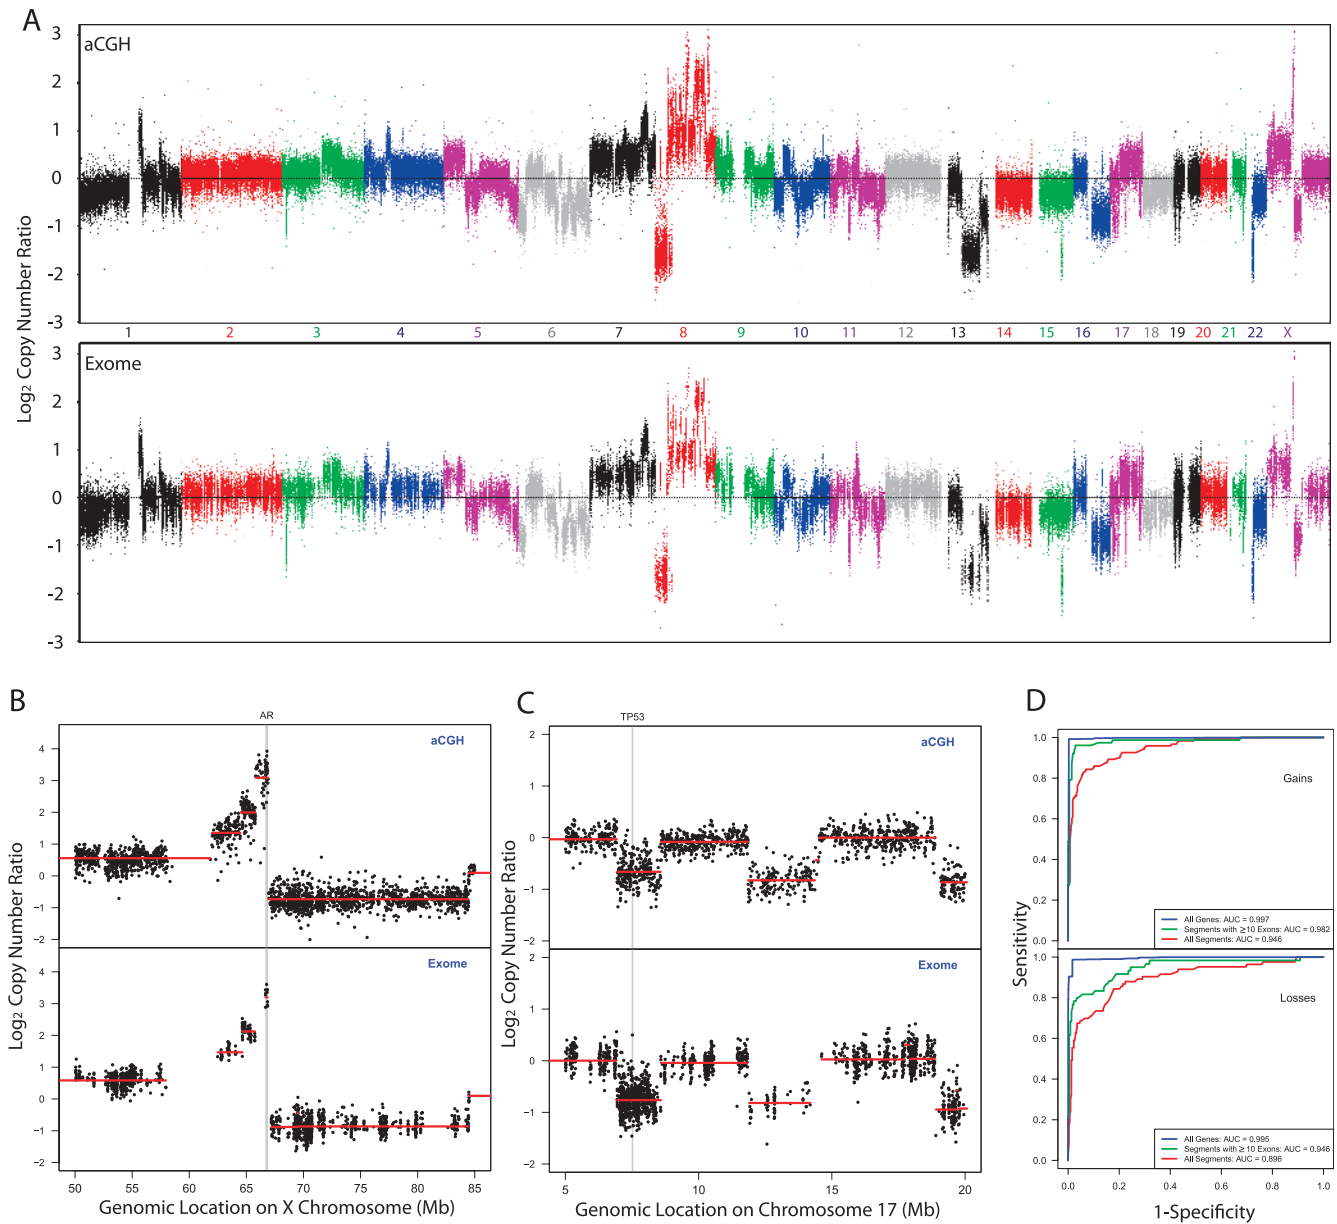

**Figure W2.** Concordance of aCGH and exome capture copy number assessments in sample WA55. (A) Overall copy number across the genome for sample WA55. Log<sub>2</sub>(copy number ratio) between tumor and matched normal is shown on the vertical axis; each point represents the log-transformed ratio for each targeted exon or aCGH probe, ordered by genomic coordinates. Large-scale amplifications and deletions are visible and agree in magnitude across the two technologies. (B) Copy number for sample WA55 by aCGH and exome sequencing in a 35-Mb region containing the AR gene. Both technologies reveal the same focal pattern of amplification and give similar estimates of the number of copies of the AR gene. Red line segments represent segmented copy number data. (C) Copy number for sample WA55 by aCGH and exome sequencing in a 15-Mb region containing the TP53 gene. Both technologies reveal focal one-copy loss of TP53 in this sample. Red line segments represent segmented copy number data. (D) Classification performance of exome capture sequencing relative to aCGH for sample WA55. ROC curves are shown, using aCGH copy number assessments as a criterion standard. ROC curves are presented for classifying all aCGH segments (red), segments containing at least ten targeted exons (green), and all targeted genes (blue).

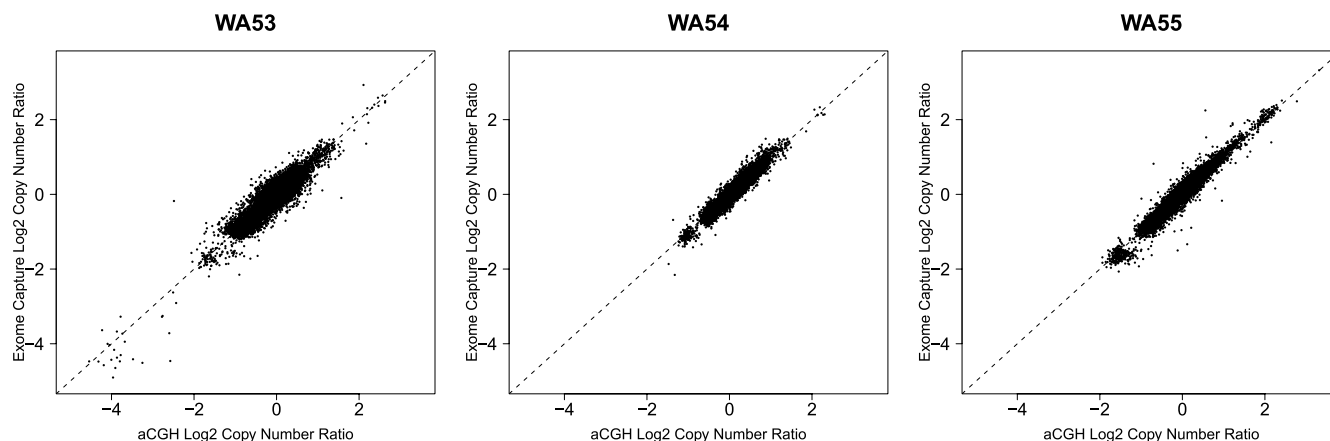

**Figure W3.** Concordance of copy number by aCGH and targeted exome sequencing through genomic windows analysis. Scatterplots show log<sub>2</sub> copy number ratios by each of aCGH and exome sequencing, computed as mean log<sub>2</sub> ratios over windows covering the genome. Windows were chosen to include at least five aCGH probes and at least five targeted exons to enable reliable comparison. For each sample, the mean log<sub>2</sub> copy number ratios were very highly correlated (WA53; 0.92, WA54; 0.96, WA55; 0.97,  $P < .001$  for each sample).

**Table W1.** AUC Results for Exome Sequencing Compared with aCGH.

|                                                  | Gain  |       |       | Loss  |       |       |
|--------------------------------------------------|-------|-------|-------|-------|-------|-------|
|                                                  | WA53  | WA54  | WA55  | WA53  | WA54  | WA55  |
| All segments*                                    | 0.971 | 0.913 | 0.946 | 0.956 | 0.902 | 0.896 |
| Segments containing $\geq 2$ exons <sup>†</sup>  | 0.979 | 0.945 | 0.970 | 0.957 | 0.956 | 0.942 |
| Segments containing $\geq 10$ exons <sup>‡</sup> | 0.979 | 0.977 | 0.982 | 0.951 | 0.958 | 0.946 |
| All genes <sup>‡</sup>                           | 0.993 | 0.989 | 0.997 | 0.994 | 0.993 | 0.995 |
| Informative genes <sup>§</sup>                   | 0.984 | 0.991 | 0.998 | 0.997 | 0.991 | 0.994 |

\*ROC curves for predicting aberration status (gain *vs* no gain or loss *vs* no loss) of each segment identified from segmentation analysis of aCGH data.

<sup>†</sup>ROC curves for predicting aberration of each segment identified from segmentation analysis of aCGH data, excluding segments overlapping fewer than 2 (or 10) targeted exons.

<sup>‡</sup>ROC curves for predicting aberration status of each gene targeted by exome sequencing.

<sup>§</sup>ROC curves for predicting aberration status of each informative gene targeted by exome sequencing.

**Table W2.** Prostate Cancer Tissue Specimens Used for Exome Sequencing.

| Sample Name          | Disease State* | Age <sup>†</sup> | Gleason Score <sup>‡</sup> | Prior Treatment <sup>§</sup> | ETS/RAF Status <sup>¶</sup> |
|----------------------|----------------|------------------|----------------------------|------------------------------|-----------------------------|
| WA53                 | CRPC           | 68               | NA                         | H, C, X                      | ERG <sup>+</sup>            |
| WA54                 | CRPC           | 73               | NA                         | P, R, H, C, X                | ERG <sup>+</sup>            |
| WA55                 | CRPC           | 72               | NA                         | H, C, X                      | ERG <sup>+</sup>            |
| WA35                 | CRPC           | 71               | NA                         | R, H, C, X                   | Negative                    |
| WA42                 | CRPC           | 61               | NA                         | H, C                         | Negative                    |
| WA43-27 (celiac LN)  | CRPC           | 52               | NA                         | P, R, H, C                   | Negative                    |
| WA43-44 (bladder)    | CRPC           |                  |                            |                              |                             |
| WA43-71 (right lung) | CRPC           |                  |                            |                              |                             |
| WA46                 | CRPC           | 71               | NA                         | P, R, H, C, X                | Negative                    |
| WA49                 | CRPC           | 68               | NA                         | P, R, H, C                   | ERG <sup>+</sup>            |
| WA50                 | CRPC           | 78               | NA                         | P, R, H, C                   | ERG <sup>+</sup>            |
| WA51                 | CRPC           | 65               | NA                         | P, H, C, X                   | Negative                    |
| WA52                 | CRPC           | 80               | NA                         | P, H, C                      | ERG <sup>+</sup>            |
| WA56                 | CRPC           | 79               | NA                         | P, R, H, C, X                | ERG <sup>+</sup>            |
| WA57                 | CRPC           | 73               | NA (NE diff)               | R, H, C,                     | ERG <sup>+</sup>            |
| WA59                 | CRPC           | 59               | NA                         | H, C, X                      | Negative                    |
| WA60                 | CRPC           | 62               | NA                         | H, C                         | ERG <sup>+</sup>            |

\*Localized prostate cancer (PC) or castrate-resistant metastatic PC (CRPC).

<sup>†</sup>Age at diagnosis (PC) or death (CRPC).

<sup>‡</sup>Gleason score of profiled prostatectomy specimen for PC. CRPCs with neuroendocrine (NE) differentiation are noted.

<sup>§</sup>C indicates chemotherapy; H, hormone therapy; P, prostatectomy; R, radiation; X, palliative radiation.

<sup>¶</sup>Rearrangements in ETS or RAF family genes.

**Table W3.** Prostate Cancer Exome Sequencing Statistics.

| Sample              | Status      | Agilent SureSelect Human All Exon Kit (Mb) | Bases in Target Region | Reads Sequenced (after Quality Filtering) | Bases Sequenced (after Quality Filtering) | Bases Mapped to Genome | Bases Mapped to Target Region | Mean No. Reads per Targeted Base |
|---------------------|-------------|--------------------------------------------|------------------------|-------------------------------------------|-------------------------------------------|------------------------|-------------------------------|----------------------------------|
| WA35                | Tumor       | 50                                         | 51,712,500             | 170,916,320                               | 13,331,472,960                            | 10,558,678,026         | 5,238,994,222                 | 101.31                           |
|                     | Normal      | 50                                         | 51,712,500             | 157,827,174                               | 12,310,519,572                            | 9,722,413,350          | 4,443,761,328                 | 85.93                            |
| WA42                | Tumor       | 50                                         | 51,712,500             | 169,227,800                               | 13,199,768,400                            | 11,152,269,258         | 5,328,029,502                 | 103.03                           |
|                     | Normal      | 50                                         | 51,712,500             | 160,543,858                               | 12,522,420,924                            | 10,584,966,288         | 5,238,213,050                 | 101.29                           |
| WA43                | Tumor 43-27 | 50                                         | 51,712,500             | 106,207,750                               | 8,284,204,500                             | 7,078,252,896          | 3,474,444,817                 | 67.19                            |
|                     | Tumor 43-44 | 50                                         | 51,712,500             | 119,846,711                               | 9,348,043,458                             | 8,062,722,408          | 4,302,838,713                 | 83.21                            |
|                     | Tumor 43-71 | 50                                         | 51,712,500             | 115,921,897                               | 9,041,907,966                             | 7,819,368,804          | 3,702,454,417                 | 71.60                            |
|                     | Normal      | 50                                         | 51,712,500             | 109,694,911                               | 8,556,203,058                             | 7,301,239,530          | 3,538,639,763                 | 68.43                            |
| WA46                | Tumor       | 50                                         | 51,712,500             | 174,132,908                               | 13,582,366,824                            | 11,159,069,376         | 5,653,532,988                 | 109.33                           |
|                     | Normal      | 50                                         | 51,712,500             | 174,753,667                               | 13,630,786,026                            | 11,418,269,070         | 5,428,312,362                 | 104.97                           |
| WA49                | Tumor       | 50                                         | 51,712,500             | 155,083,960                               | 12,096,548,880                            | 10,251,439,692         | 5,091,480,149                 | 98.46                            |
|                     | Normal      | 50                                         | 51,712,500             | 150,941,382                               | 11,773,427,796                            | 9,990,123,234          | 5,142,727,707                 | 199.45                           |
| WA50                | Tumor       | 50                                         | 51,712,500             | 151,428,570                               | 11,811,428,460                            | 10,163,517,936         | 4,825,565,562                 | 93.32                            |
|                     | Normal      | 50                                         | 51,712,500             | 146,431,894                               | 11,421,687,732                            | 9,712,458,132          | 4,918,010,589                 | 95.10                            |
| WA51                | Tumor       | 50                                         | 51,712,500             | 165,709,454                               | 12,925,337,412                            | 10,739,425,398         | 4,824,644,281                 | 93.30                            |
|                     | Normal      | 50                                         | 51,712,500             | 170,866,524                               | 13,327,588,872                            | 11,006,378,916         | 5,103,100,934                 | 98.68                            |
| WA52                | Tumor       | 50                                         | 51,712,500             | 196,334,388                               | 15,314,082,264                            | 12,710,410,284         | 6,105,297,939                 | 118.06                           |
|                     | Normal      | 50                                         | 51,712,500             | 182,664,677                               | 14,247,844,806                            | 11,851,474,518         | 5,394,831,142                 | 104.32                           |
| WA53                | Tumor       | 38                                         | 37,806,033             | 170,043,479                               | 13,263,391,362                            | 11,275,509,726         | 6,813,696,982                 | 180.23                           |
|                     | Normal      | 38                                         | 37,806,033             | 160,836,761                               | 12,545,267,358                            | 10,592,709,894         | 6,593,161,035                 | 174.39                           |
| WA54                | Tumor       | 38                                         | 37,806,033             | 109,465,569                               | 8,538,314,382                             | 7,274,785,830          | 4,409,679,103                 | 116.64                           |
|                     | Normal      | 38                                         | 37,806,033             | 168,886,512                               | 13,173,147,936                            | 11,227,983,078         | 7,016,349,732                 | 185.59                           |
| WA55                | Tumor       | 38                                         | 37,806,033             | 169,683,500                               | 13,235,313,000                            | 11,190,529,662         | 6,730,794,029                 | 178.03                           |
|                     | Normal      | 38                                         | 37,806,033             | 168,001,511                               | 13,104,117,858                            | 11,095,714,656         | 6,872,481,717                 | 181.78                           |
| WA56                | Tumor       | 50                                         | 51,712,500             | 171,138,470                               | 13,348,800,660                            | 10,979,986,056         | 5,177,318,788                 | 100.12                           |
|                     | Normal      | 50                                         | 51,712,500             | 173,359,773                               | 13,522,062,294                            | 11,245,543,686         | 5,497,614,730                 | 106.31                           |
| WA57                | Tumor       | 50                                         | 51,712,500             | 172,761,810                               | 13,475,421,180                            | 10,834,401,240         | 4,778,197,473                 | 92.40                            |
|                     | Normal      | 50                                         | 51,712,500             | 169,816,928                               | 13,245,720,384                            | 10,482,745,260         | 5,096,773,379                 | 98.56                            |
| WA59                | Tumor       | 50                                         | 51,712,500             | 159,528,926                               | 12,443,256,228                            | 10,058,917,362         | 4,475,487,277                 | 86.55                            |
|                     | Normal      | 50                                         | 51,712,500             | 167,669,729                               | 13,078,238,862                            | 10,418,808,036         | 4,900,312,121                 | 94.76                            |
| WA60                | Tumor       | 50                                         | 51,712,500             | 166,908,169                               | 13,018,837,182                            | 10,453,483,014         | 4,569,838,785                 | 88.37                            |
|                     | Normal      | 50                                         | 51,712,500             | 163,743,302                               | 12,771,977,556                            | 10,272,887,664         | 4,726,398,012                 | 91.40                            |
| Mean across samples |             |                                            | 49,105,037             | 158,449,321                               | 12,359,047,067                            | 10,271,452,571         | 5,169,155,707                 | 105.27                           |

**Table W4.** Summary of Aberrations across 17 Lethal Metastatic Prostate Samples.

| Sample  | All Gains (Copy Number Ratio $\geq 1.25$ ) |                                            | All Losses (Copy Number Ratio $\leq 0.75$ ) |                                            | High-level Gains (Copy Number Ratio $\geq 2.0$ ) |                                            | Homozygous Losses (Copy Number Ratio $\leq 0.50$ ) |                                            |
|---------|--------------------------------------------|--------------------------------------------|---------------------------------------------|--------------------------------------------|--------------------------------------------------|--------------------------------------------|----------------------------------------------------|--------------------------------------------|
|         | No. Aberrations*                           | Length of Altered Genome (Mb) <sup>†</sup> | No. Aberrations*                            | Length of Altered Genome (Mb) <sup>†</sup> | No. Aberrations*                                 | Length of Altered Genome (Mb) <sup>†</sup> | No. Aberrations*                                   | Length of Altered Genome (Mb) <sup>†</sup> |
| WA35    | 233                                        | 407.5                                      | 70                                          | 280.2                                      | 35                                               | 26.5                                       | 9                                                  | 1.2                                        |
| WA42    | 12                                         | 286.0                                      | 81                                          | 428.1                                      | 0                                                | 0.0                                        | 19                                                 | 19.7                                       |
| WA43-27 | 53                                         | 334.6                                      | 56                                          | 538.0                                      | 18                                               | 23.1                                       | 9                                                  | 0.7                                        |
| WA43-44 | 51                                         | 368.5                                      | 61                                          | 492.3                                      | 23                                               | 30.1                                       | 9                                                  | 0.7                                        |
| WA43-71 | 490                                        | 849.5                                      | 609                                         | 379.0                                      | 25                                               | 23.3                                       | 89                                                 | 25.9                                       |
| WA46    | 596                                        | 720.5                                      | 79                                          | 71.1                                       | 112                                              | 108.2                                      | 7                                                  | 0.5                                        |
| WA49    | 173                                        | 404.7                                      | 43                                          | 264.8                                      | 29                                               | 26.1                                       | 9                                                  | 37.5                                       |
| WA50    | 88                                         | 429.2                                      | 96                                          | 183.1                                      | 3                                                | 1.2                                        | 17                                                 | 3.4                                        |
| WA51    | 30                                         | 273.4                                      | 81                                          | 538.3                                      | 3                                                | 101.5                                      | 22                                                 | 56.4                                       |
| WA52    | 33                                         | 240.8                                      | 55                                          | 79.8                                       | 0                                                | 0.0                                        | 3                                                  | 3.5                                        |
| WA53    | 93                                         | 332.9                                      | 117                                         | 513.3                                      | 18                                               | 22.5                                       | 17                                                 | 18.8                                       |
| WA54    | 100                                        | 353.1                                      | 65                                          | 475.7                                      | 19                                               | 7.7                                        | 9                                                  | 30.7                                       |
| WA55    | 104                                        | 506.3                                      | 83                                          | 282.6                                      | 29                                               | 58.7                                       | 18                                                 | 75.5                                       |
| WA56    | 51                                         | 421.9                                      | 71                                          | 406.2                                      | 2                                                | 3.5                                        | 18                                                 | 70.2                                       |
| WA57    | 57                                         | 421.3                                      | 78                                          | 639.6                                      | 11                                               | 26.2                                       | 34                                                 | 144.6                                      |
| WA59    | 306                                        | 562.5                                      | 282                                         | 277.2                                      | 37                                               | 31.7                                       | 28                                                 | 28.0                                       |
| WA60    | 743                                        | 433.6                                      | 746                                         | 912.0                                      | 19                                               | 21.4                                       | 59                                                 | 67.9                                       |
| Median  | 93                                         | 407.5                                      | 79                                          | 406.2                                      | 19                                               | 23.3                                       | 17                                                 | 25.9                                       |

\*Number of aberrations refers to the number of segments identified from segmentation analysis exceeding the given threshold.

<sup>†</sup>Length of altered genome refers to the combined length of these aberrant segments per sample, expressed in megabases.
